# Supplementary material for: Medical Cannabinoids for Cancer Cachexia: A Systematic Review and Meta-Analysis
Source: Hindawi journal article supplement (doi:10.1155/2019/2864384), 2019-06-23
Supplement: f1 [file 2864384.f1.pdf]

Figure S1

| Study or Subgroup                                                                                           | Experimental |      |            | Control |      |            | Weight        | Mean Difference<br>IV, Random, 95% CI |
|-------------------------------------------------------------------------------------------------------------|--------------|------|------------|---------|------|------------|---------------|---------------------------------------|
|                                                                                                             | Mean         | SD   | Total      | Mean    | SD   | Total      |               |                                       |
| <b>1.1.1 cannabinoid-appetite</b>                                                                           |              |      |            |         |      |            |               |                                       |
| Brisbois 2011                                                                                               | 6.07         | 1.13 | 11         | 5.09    | 1.08 | 10         | 8.4%          | 0.98 [0.03, 1.93]                     |
| Johnson 2010                                                                                                | 4.86         | 1.2  | 118        | 4.39    | 0.7  | 59         | 18.5%         | 0.47 [0.19, 0.75]                     |
| Strasser 2006                                                                                               | 3.55         | 2.2  | 183        | 4.18    | 2.38 | 43         | 10.4%         | -0.63 [-1.41, 0.15]                   |
| <b>Subtotal (95% CI)</b>                                                                                    |              |      | <b>312</b> |         |      | <b>112</b> | <b>37.3%</b>  | <b>0.27 [-0.51, 1.04]</b>             |
| Heterogeneity: Tau <sup>2</sup> = 0.35; Chi <sup>2</sup> = 8.39, df = 2 (P = 0.02); I <sup>2</sup> = 76%    |              |      |            |         |      |            |               |                                       |
| Test for overall effect: Z = 0.68 (P = 0.50)                                                                |              |      |            |         |      |            |               |                                       |
| <b>1.1.2 THC-appetite</b>                                                                                   |              |      |            |         |      |            |               |                                       |
| Brisbois 2011                                                                                               | 6.07         | 1.13 | 11         | 5.09    | 1.08 | 10         | 8.4%          | 0.98 [0.03, 1.93]                     |
| Johnson 2010                                                                                                | 4.64         | 0.7  | 58         | 4.39    | 0.7  | 59         | 18.9%         | 0.25 [-0.00, 0.50]                    |
| Strasser 2006                                                                                               | 3.26         | 1.85 | 92         | 4.18    | 2.38 | 43         | 10.1%         | -0.92 [-1.73, -0.11]                  |
| <b>Subtotal (95% CI)</b>                                                                                    |              |      | <b>161</b> |         |      | <b>112</b> | <b>37.4%</b>  | <b>0.09 [-0.77, 0.95]</b>             |
| Heterogeneity: Tau <sup>2</sup> = 0.45; Chi <sup>2</sup> = 10.19, df = 2 (P = 0.006); I <sup>2</sup> = 80%  |              |      |            |         |      |            |               |                                       |
| Test for overall effect: Z = 0.21 (P = 0.83)                                                                |              |      |            |         |      |            |               |                                       |
| <b>1.1.3 CE-appetite</b>                                                                                    |              |      |            |         |      |            |               |                                       |
| Johnson 2010                                                                                                | 5.07         | 1.52 | 60         | 4.39    | 0.7  | 59         | 16.1%         | 0.68 [0.26, 1.10]                     |
| Strasser 2006                                                                                               | 3.84         | 2.47 | 91         | 4.18    | 2.38 | 43         | 9.2%          | -0.34 [-1.21, 0.53]                   |
| <b>Subtotal (95% CI)</b>                                                                                    |              |      | <b>151</b> |         |      | <b>102</b> | <b>25.3%</b>  | <b>0.24 [-0.74, 1.23]</b>             |
| Heterogeneity: Tau <sup>2</sup> = 0.40; Chi <sup>2</sup> = 4.24, df = 1 (P = 0.04); I <sup>2</sup> = 76%    |              |      |            |         |      |            |               |                                       |
| Test for overall effect: Z = 0.48 (P = 0.63)                                                                |              |      |            |         |      |            |               |                                       |
| <b>Total (95% CI)</b>                                                                                       |              |      | <b>624</b> |         |      | <b>326</b> | <b>100.0%</b> | <b>0.22 [-0.14, 0.57]</b>             |
| Heterogeneity: Tau <sup>2</sup> = 0.16; Chi <sup>2</sup> = 24.90, df = 7 (P = 0.0008); I <sup>2</sup> = 72% |              |      |            |         |      |            |               |                                       |
| Test for overall effect: Z = 1.21 (P = 0.23)                                                                |              |      |            |         |      |            |               |                                       |
| Test for subgroup differences: Chi <sup>2</sup> = 0.10, df = 2 (P = 0.95), I <sup>2</sup> = 0%              |              |      |            |         |      |            |               |                                       |

Figure S2

| Study or Subgroup                                                                                        | Experimental |      |            | Control |      |            | Weight        | Mean Difference<br>IV, Random, 95% CI |
|----------------------------------------------------------------------------------------------------------|--------------|------|------------|---------|------|------------|---------------|---------------------------------------|
|                                                                                                          | Mean         | SD   | Total      | Mean    | SD   | Total      |               |                                       |
| <b>1.1.1 cannabinoid-appetite</b>                                                                        |              |      |            |         |      |            |               |                                       |
| Brisbois 2011                                                                                            | 6.07         | 1.13 | 11         | 5.09    | 1.08 | 10         | 5.4%          | 0.98 [0.03, 1.93]                     |
| Johnson 2010                                                                                             | 4.86         | 1.2  | 118        | 4.39    | 0.7  | 59         | 32.9%         | 0.47 [0.19, 0.75]                     |
| Strasser 2006                                                                                            | 3.55         | 2.2  | 183        | 4.18    | 2.38 | 43         |               | Not estimable                         |
| <b>Subtotal (95% CI)</b>                                                                                 |              |      | <b>129</b> |         |      | <b>69</b>  | <b>38.3%</b>  | <b>0.52 [0.23, 0.81]</b>              |
| Heterogeneity: Tau <sup>2</sup> = 0.00; Chi <sup>2</sup> = 1.03, df = 1 (P = 0.31); I <sup>2</sup> = 3%  |              |      |            |         |      |            |               |                                       |
| Test for overall effect: Z = 3.51 (P = 0.0005)                                                           |              |      |            |         |      |            |               |                                       |
| <b>1.1.2 THC-appetite</b>                                                                                |              |      |            |         |      |            |               |                                       |
| Brisbois 2011                                                                                            | 6.07         | 1.13 | 11         | 5.09    | 1.08 | 10         | 5.4%          | 0.98 [0.03, 1.93]                     |
| Johnson 2010                                                                                             | 4.64         | 0.7  | 58         | 4.39    | 0.7  | 59         | 36.2%         | 0.25 [-0.00, 0.50]                    |
| Strasser 2006                                                                                            | 3.26         | 1.85 | 92         | 4.18    | 2.38 | 43         | 0.0%          | -0.92 [-1.73, -0.11]                  |
| <b>Subtotal (95% CI)</b>                                                                                 |              |      | <b>69</b>  |         |      | <b>69</b>  | <b>41.6%</b>  | <b>0.47 [-0.19, 1.12]</b>             |
| Heterogeneity: Tau <sup>2</sup> = 0.14; Chi <sup>2</sup> = 2.14, df = 1 (P = 0.14); I <sup>2</sup> = 53% |              |      |            |         |      |            |               |                                       |
| Test for overall effect: Z = 1.40 (P = 0.16)                                                             |              |      |            |         |      |            |               |                                       |
| <b>1.1.3 CE-appetite</b>                                                                                 |              |      |            |         |      |            |               |                                       |
| Johnson 2010                                                                                             | 5.07         | 1.52 | 60         | 4.39    | 0.7  | 59         | 20.1%         | 0.68 [0.26, 1.10]                     |
| Strasser 2006                                                                                            | 3.84         | 2.47 | 91         | 4.18    | 2.38 | 43         |               | Not estimable                         |
| <b>Subtotal (95% CI)</b>                                                                                 |              |      | <b>60</b>  |         |      | <b>59</b>  | <b>20.1%</b>  | <b>0.68 [0.26, 1.10]</b>              |
| Heterogeneity: Not applicable                                                                            |              |      |            |         |      |            |               |                                       |
| Test for overall effect: Z = 3.14 (P = 0.002)                                                            |              |      |            |         |      |            |               |                                       |
| <b>Total (95% CI)</b>                                                                                    |              |      | <b>258</b> |         |      | <b>197</b> | <b>100.0%</b> | <b>0.49 [0.26, 0.72]</b>              |
| Heterogeneity: Tau <sup>2</sup> = 0.02; Chi <sup>2</sup> = 5.94, df = 4 (P = 0.20); I <sup>2</sup> = 33% |              |      |            |         |      |            |               |                                       |
| Test for overall effect: Z = 4.17 (P < 0.0001)                                                           |              |      |            |         |      |            |               |                                       |
| Test for subgroup differences: Chi <sup>2</sup> = 0.47, df = 2 (P = 0.79), I <sup>2</sup> = 0%           |              |      |            |         |      |            |               |                                       |

Figure S3

| Study or Subgroup     | Experimental |       |            | Control |       |           | Weight        | Mean Difference<br>IV, Random, 95% CI |
|-----------------------|--------------|-------|------------|---------|-------|-----------|---------------|---------------------------------------|
|                       | Mean         | SD    | Total      | Mean    | SD    | Total     |               |                                       |
| Johnson 2010          | 35.97        | 15.85 | 93         | 52.36   | 15.95 | 51        | 69.4%         | -16.39 [-21.83, -10.95]               |
| Brisbois 2011         | 98.5         | 20.2  | 11         | 101.8   | 19.3  | 10        | 30.6%         | -3.30 [-20.20, 13.60]                 |
| <b>Total (95% CI)</b> |              |       | <b>104</b> |         |       | <b>61</b> | <b>100.0%</b> | <b>-12.39 [-24.21, -0.57]</b>         |

Heterogeneity: Tau<sup>2</sup> = 44.66; Chi<sup>2</sup> = 2.09, df = 1 (P = 0.15); I<sup>2</sup> = 52%  
 Test for overall effect: Z = 2.06 (P = 0.04)
